# Supplementary material for: Chemical labeling strategies for small molecule natural product detection and isolation
Source: Royal Society of Chemistry journal article supplement (doi:10.1039/d0np00034e), 2021-01-01
Supplement: d0np00034e1.pdf [file d0np00034e1.pdf]

67 TOTAL PUBLICATIONS (31 HPLC-UV)

46%

JNP 2020, ISSUE 1

Prenylated p-Terphenyls from a Mangrove Endophytic Fungus, *Aspergillus candidus* LDJ-5

HPLC-UV

FUNGUS

Isopimarane Diterpenoids from the Rhizomes of *Kaempferia marginata* and Their Potential Anti-inflammatory Activities

TLC/silica gel

RHIZOMES

$\alpha$ -Glucosidase Inhibitory Isomeric Corniculatolides from the Stems of the Indian Mangrove Plant, *Xylocarpus granatum*

TLC/silica gel

PLANT STEMS

Antcamphorols A–K, Cytotoxic and ROS Scavenging Triterpenoids from *Antrodia camphorate*

TLC/silica gel

MUSHROOM

Water-Soluble Glutamic Acid Derivatives Produced in Culture by *Penicillium solitum* IS1-A from King George Island, Maritime Antarctica

HPLC-UV-MS

FUNGUS

l-Phenylalanine Alters the Privileged Secondary Metabolite Production in the Marine-Derived Fungus *Trichoderma erinaceum* F1-1

HPLC-UV

FUNGUS

Isolation of a High-Affinity Cannabinoid for the Human CB1 Receptor from a Medicinal *Cannabis sativa* Variety:  $\Delta^9$ -Tetrahydrocannabinol, the Butyl Homologue of  $\Delta^9$ -Tetrahydrocannabinol

HPLC-UV-MS

PLANT

Structurally Diverse Meroterpenoids from a Marine-Derived *Aspergillus* sp. Fungus

TLC/silica gel

FUNGUS

Structure Reassignment of Echin sulfone A and the Echin sulfonic Acids A–D Supported by Single-Crystal X-ray Diffraction and Density Functional Theory Analysis

HPLC-UV-MS  
MARINE SPONGE

Benwamycins A–G, Trialkyl-Substituted Benzene Derivatives from a Soil-Derived Streptomyces  
HPLC-UV  
BACTERIA

Rapid Recognition and Targeted Isolation of Anti-HIV Daphnane Diterpenes from *Daphne genkwa*  
Guided by UPLC-MSn  
HPLC-UV-MS  
PLANT

Schwarzinicines A–G, 1,4-Diarylbutanoid–Phenethylamine Conjugates from the Leaves of *Ficus schwarzii*  
TLC/siica gel  
PLANT LEAVES

Phloroglucinol Benzophenones and Xanthenes from the Leaves of *Garcinia cowa* and Their Nitric Oxide  
Production and  $\alpha$ -Glucosidase Inhibitory Activities  
TLC/siica gel  
PLANT LEAVES

Reisolation and Configurational Reinvestigation of Cottoquinazolines E–G from an Arthropod-Derived  
Strain of the Fungus *Neosartorya fischeri*  
TLC/siica gel  
FUNGUS

Unraveling Structures Containing Highly Conjugated Pyrrolo[4,3,2-de]quinoline Cores That Are Deficient  
in Diagnostic Proton NMR Signals  
NMR  
FUNGUS

**JNP 2020, ISSUE 2**

Modified Eremophilanes from *Parasenecio hastatus* and Their Neuroprotective Activities  
TLC/silica gel  
PLANT

Isolation, Identification, and Decomposition of Antibacterial Dialkylresorcinols from a Chinese  
*Pseudomonas aurantiaca* Strain  
HPLC-UV  
BACTERIA

The Isolation of Pyrroloformamide Congeners and Characterization of Their Biosynthetic Gene Cluster  
UNCLEAR (“During activity-based metabolite profiling of actinomycete strains...”)  
BACTERIA

Oxygenated Cyclohexene Derivatives and Other Constituents from the Roots of *Monanthotaxis*  
*trichocarpa*  
TLC/silica gel  
FUNGUS

Palhinosides A–H: Flavone Glucosidic Truxinate Esters with Neuroprotective Activities from *Palhinhaea*  
*cernua*  
TLC/silica gel  
PLANT

Protective Effects of Compounds from *Cimicifuga dahurica* against Amyloid Beta Production in Vitro and  
Scopolamine-Induced Memory Impairment in Vivo  
TLC/silica gel  
PLANT

A (1→6)-Branched (1→4)-β-d-Glucan from *Grifola frondosa* Inhibits Lipopolysaccharide-Induced  
Cytokine Production in RAW264.7 Macrophages by Binding to TLR2 Rather than Dectin-1 or CR3  
Receptors  
Gel filtration  
MUSHROOM

An NMR-Based Chemometric Strategy to Identify *Leishmania donovani* Nucleoside Hydrolase Inhibitors  
from the Brazilian Tree *Ormosia arborea*  
NMR  
TREE

19-nor-, 20-nor-, and tetranor-Halimane-Type Furanoditerpenoids from *Croton crassifolius*  
TLC/silica gel  
FUNGUS

Pigments of the Moss *Paraleucobryum longifolium*: Isolation and Structure Elucidation of Prenyl-Substituted 8,8'-Linked 9,10-Phenanthrenequinone Dimers

TLC/silica gel

PLANT

Absolute Configuration and Antibiotic Activity of Piceamycin

HPLC-UV

BACTERIA

Siderophores from the Entomopathogenic Fungus *Beauveria bassiana*

HPLC-UV-MS

BACTERIA

A Meroisoprenoid, Heptenolides, and C-Benzylated Flavonoids from *Sphaerocoryne gracilis* ssp. *Gracilis*

TLC/silica gel

PLANT

Stilbenes with Potent Protein Tyrosine Phosphatase-1B Inhibitory Activity from the Roots of *Polygonum multiflorum*

TLC/silica gel

PLANT

Metabolomics Approach Expands the Classification of Propolis Samples from Midwest Brazil

HPLC-UV-MS

PROPOLIS

Antifungal Norditerpene Oidiodactones from the Fungus *Oidiodendron truncatum*, a Potential Biocontrol Agent for White-Nose Syndrome in Bats

HPLC-UV

FUNGUS

Absolute Configuration and Corrected NMR Assignment of 17-Hydroxycyclooctatin, a Fused 5-8-5

Tricyclic Diterpene

HPLC-UV

BACTERIA

Dammarane-Type Triterpenoids from the Roots of *Rhus chinensis* and Their Preventive Effects on Zebrafish Heart Failure and Thrombosis

HPLC-UV

PLANTS

Bromopyrrole Alkaloids of the Sponge *Agelas oroides* Collected Near the Israeli Mediterranean Coastline

C18

SPONGE

Calosides A-F, Cardenolides from *Calotropis gigantea* and Their Cytotoxic Activity

TLC/silica gel

PLANT

Nostotrebin 6 Related Cyclopentenediones and  $\delta$ -Lactones with Broad Activity Spectrum Isolated from the Cultivation Medium of the Cyanobacterium *Nostoc* sp. CBT1153

HPLC-UV-MS  
BACTERIA

Immunosuppressive Nor-isopimarane Diterpenes from Cultures of the Fungicolous Fungus *Xylaria longipes* HFG1018

TLC/silica gel  
FUNGUS

Orthoscuticellines A–E,  $\beta$ -Carboline Alkaloids from the Bryozoan *Orthoscuticella ventricosa* Collected in Australia

HPLC-UV  
BRYOZOAN

Isocadiolides A–H: Polybrominated Aromatics from a *Synoicum* sp. Ascidian

HPLC-UV-MS  
BRYOZOAN

Rabenchromenone and Rabenzophenone, Phytotoxic Tetrasubstituted Chromenone and Hexasubstituted Benzophenone Constituents Produced by the Oak-Dieback-Associated Fungus *Fimetariella rabenhorstii*

TLC/silica gel  
FUNGUS

Phytotoxic Metabolites from Three *Neofusicoccum* Species Causal Agents of *Botryosphaeria* Dieback in Australia, Luteopyroxin, Neoanthraquinone, and Luteoxepinone, a Disubstituted Furo- $\alpha$ -pyrone, a Hexasubstituted Anthraquinone, and a Trisubstituted Oxepi-2-one from *Neofusicoccum luteum*

TLC/silica gel  
FUNGUS

Sigillins from Springtails Are Potent Natural Insecticides

GC-MS  
BUG

Discovery and Characterization of a PKS–NRPS Hybrid in *Aspergillus terreus* by Genome Mining

HPLC-UV  
FUNGUS

Yanhusanines A–F, Isoquinoline-Derived Alkaloid Enantiomers from *Corydalis yanhusuo* and Their Biological Activity

TLC/silica gel  
PLANT

Chrysosporazines F–M: P-Glycoprotein Inhibitory Phenylpropanoid Piperazines from an Australian Marine Fish Derived Fungus, *Chrysosporium* sp. CMB-F294

HPLC-UV  
FUNGUS

Polyesterified Sesquiterpenoids from the Seeds of *Celastrus paniculatus* as Lifespan-Extending Agents for the Nematode *Caenorhabditis elegans*

HPLC-UV

PLANT

Bishomoscalarane Sesterterpenoids from the Sponge *Dysidea granulosa* Collected in the South China Sea

TLC/silica gel

SPONGE

Amphiepicoccins A–J: Epipolythiodioxopiperazines from the Fish-Gill-Derived Fungus *Epicoccum nigrum*

HDN17-88

HPLC-UV

FUNGUS

Quintaquinone, a Merosesquiterpene from the Yellow Sponge *Verongula cf. rigida* Esper

TLC/silica gel

SPONGE

Identification of Holrhizins E–Q Reveals the Diversity of Nonribosomal Lipopeptides in *Paraburkholderia rhizoxinica*

HPLC-UV-MS

BACTERIA

A Fluorescent Compound from the Exuviae of the Scorpion, *Liocheles australasiae*

FLUORESCENCE

SCORPION

Kinase-Inhibitory Nucleoside Derivatives from the Pacific Bryozoan *Nelliella nelliiformis*

NMR

BRYOZOAN

**JNP 2020, ISSUE 3**

Anibamine and Its Analogues: Potent Antiplasmodial Agents from *Aniba citrifolia*

HPLC-UV

PLANT

Meliponamycins: Antimicrobials from Stingless Bee-Associated *Streptomyces* sp.

HPLC-UV

BACTERIA

Pagoamide A, a Cyclic Depsipeptide Isolated from a Cultured Marine Chlorophyte, *Derbesia* sp., Using MS/MS-Based Molecular Networking

HPLC-UV-MS

BACTERIA

Antioxidant Activity of Compounds Isolated from *Elaeagnus umbellata* Promotes Human Gingival Fibroblast Well-Being

HPLC-UV

PLANT

Advanced Glycation End Product Inhibition by Alkaloids from *Ocotea paranapiacabensis* for the Prevention of Skin Aging

TLC/silica gel

PLANT

Antimycobacterial Rufomycin Analogues from *Streptomyces atratus* Strain MJM3502

UNCLEAR

BACTERIA

Arenicolins: C-Glycosylated Depsides from *Penicillium Arenicola*

HPLC-UV-MS

FUNGUS

$\alpha$ -Glucosidase and Protein Tyrosine Phosphatase 1B Inhibitors from *Malbranchea circinata*

TLC/silica gel

PLANT

Megastigmane Derivatives from the Cladodes of *Opuntia humifusa* and Their Nitric Oxide Inhibitory Activities in Macrophages

HPLC-UV-MS

PLANT

Cryptic Species Account for the Seemingly Idiosyncratic Secondary Metabolism of *Sarcophyton glaucum* Specimens Collected in Palau

GC-FID

CORAL

Tridiscorhabdin and Didiscorhabdin, the First Discorhabdin Oligomers Linked with a Direct C–N Bridge from the Sponge *Latrunculia biformis* Collected from the Deep Sea in Antarctica

HPLC-UV-MS

SPONGE

Dynamic NMR and Computational Studies Inform the Conformational Description of Dendrillane Terpenes from the Nudibranch *Goniobranchus coi*

NMR

NUDIBRANCH

Antifungal Sesquiterpenoids, Rhodocoranes, from Submerged Cultures of the Wrinkled Peach Mushroom, *Rhodotus palmatus*

HPLC-UV

MUSHROOM

NF- $\kappa$ B Inhibitory and Antibacterial Helvolic and Fumagillin Derivatives from *Aspergillus terreus*

HPLC-UV

FUNGUS

Distribution of Bibenzyls, Prenyl Bibenzyls, Bis-bibenzyls, and Terpenoids in the Liverwort Genus *Radula*

TLC/NMR

PLANT



45 TOTAL PUBLICATIONS WHEN CHEMICAL ANALYSES OF PLANTS ARE EXCLUDED (31 HPLC-UV)

69%

JNP 2020, ISSUE 1

Prenylated p-Terphenyls from a Mangrove Endophytic Fungus, *Aspergillus candidus* LDJ-5  
HPLC-UV  
FUNGUS

Isopimarane Diterpenoids from the Rhizomes of *Kaempferia marginata* and Their Potential Anti-inflammatory Activities  
TLC/silica gel  
RHIZOMES

$\alpha$ -Glucosidase Inhibitory Isomeric Corniculatolides from the Stems of the Indian Mangrove Plant, *Xylocarpus granatum*  
TLC/silica gel  
PLANT STEMS

Antcamphorols A–K, Cytotoxic and ROS Scavenging Triterpenoids from *Antrodia camphorate*  
TLC/silica gel  
MUSHROOM

Water-Soluble Glutamic Acid Derivatives Produced in Culture by *Penicillium solitum* IS1-A from King George Island, Maritime Antarctica  
HPLC-UV-MS  
FUNGUS

L-Phenylalanine Alters the Privileged Secondary Metabolite Production in the Marine-Derived Fungus *Trichoderma erinaceum* F1-1  
HPLC-UV  
FUNGUS

Isolation of a High-Affinity Cannabinoid for the Human CB1 Receptor from a Medicinal *Cannabis sativa* Variety:  $\Delta^9$ -Tetrahydrocannabinol, the Butyl Homologue of  $\Delta^9$ -Tetrahydrocannabinol  
HPLC-UV-MS  
PLANT

Structurally Diverse Meroterpenoids from a Marine-Derived *Aspergillus* sp. Fungus  
TLC/silica gel  
FUNGUS

Structure Reassignment of Echinosulfone A and the Echinosulfonic Acids A–D Supported by Single-Crystal X-ray Diffraction and Density Functional Theory Analysis  
HPLC-UV-MS  
MARINE SPONGE

Benwamycins A–G, Trialkyl-Substituted Benzene Derivatives from a Soil-Derived Streptomyces

HPLC-UV

BACTERIA

Rapid Recognition and Targeted Isolation of Anti-HIV Daphnane Diterpenes from *Daphne genkwa*

Guided by UPLC-MSn

HPLC-UV-MS

PLANT

Schwarzinines A–G, 1,4-Diarylbutanoid-Phenethylamine-Conjugates from the Leaves of *Ficus schwarzii*

TLC/siica-gel

PLANT-LEAVES

Phloroglucinol-Benzophenones and Xanthenes from the Leaves of *Garcinia cowa* and Their Nitric Oxide Production and  $\alpha$ -Glucosidase Inhibitory Activities

TLC/siica-gel

PLANT-LEAVES

Reisolation and Configurational Reinvestigation of Cottoquinazolines E–G from an Arthropod-Derived Strain of the Fungus *Neosartorya fischeri*

TLC/siica-gel

FUNGUS

Unraveling Structures Containing Highly Conjugated Pyrrolo[4,3,2-de]quinoline Cores That Are Deficient in Diagnostic Proton NMR Signals

NMR

FUNGUS

**JNP 2020, ISSUE 2**

Modified Eremophilanes from *Parasenecio hastatus* and Their Neuroprotective Activities

TLC/silica gel

PLANT

Isolation, Identification, and Decomposition of Antibacterial Dialkylresorcinols from a Chinese *Pseudomonas aurantiaca* Strain

HPLC-UV

BACTERIA

The Isolation of Pyrroloformamide Congeners and Characterization of Their Biosynthetic Gene Cluster UNCLEAR (“During activity-based metabolite profiling of actinomycete strains...”)

BACTERIA

Oxygenated Cyclohexene Derivatives and Other Constituents from the Roots of *Monanthotaxis trichocarpa*

TLC/silica gel

FUNGUS

Palhinosides A–H: Flavone Glucosidic Truxinate Esters with Neuroprotective Activities from *Palhinhaea cernua*

TLC/silica gel

PLANT

Protective Effects of Compounds from *Cimicifuga dahurica* against Amyloid Beta Production in Vitro and Scopolamine-Induced Memory Impairment in Vivo

TLC/silica gel

PLANT

A (1→6)-Branched (1→4)-β-d-Glucan from *Grifola frondosa* Inhibits Lipopolysaccharide-Induced Cytokine Production in RAW264.7 Macrophages by Binding to TLR2 Rather than Dectin-1 or CR3 Receptors

Gel filtration

MUSHROOM

An NMR-Based Chemometric Strategy to Identify *Leishmania donovani* Nucleoside Hydrolase Inhibitors from the Brazilian Tree *Ormosia arborea*

NMR

TREE

19-nor-, 20-nor-, and tetranor-Halimane-Type Furanoditerpenoids from *Croton crassifolius*

TLC/silica gel

FUNGUS

Pigments of the Moss *Paraleucobryum longifolium*: Isolation and Structure Elucidation of Prenyl-Substituted 8,8'-Linked 9,10-Phenanthrenequinone Dimers

TLC/silica-gel

PLANT

Absolute Configuration and Antibiotic Activity of Piceamycin

HPLC-UV

BACTERIA

Siderophores from the Entomopathogenic Fungus *Beauveria bassiana*

HPLC-UV-MS

BACTERIA

A Merisoprenoid, Heptenolides, and C-Benzylated Flavonoids from *Sphaerocoryne gracilis* ssp. *Gracilis*

TLC/silica-gel

PLANT

Stilbenes with Potent Protein Tyrosine Phosphatase-1B Inhibitory Activity from the Roots of *Polygonum multiflorum*

TLC/silica-gel

PLANT

Metabolomics Approach Expands the Classification of Propolis Samples from Midwest Brazil

HPLC-UV-MS

PROPOLIS

Antifungal Norditerpene Oidiodactones from the Fungus *Oidiodendron truncatum*, a Potential Biocontrol Agent for White-Nose Syndrome in Bats

HPLC-UV

FUNGUS

Absolute Configuration and Corrected NMR Assignment of 17-Hydroxycyclooctatin, a Fused 5-8-5 Tricyclic Diterpene

HPLC-UV

BACTERIA

Dammarane-Type Triterpenoids from the Roots of *Rhus chinensis* and Their Preventive Effects on Zebrafish Heart Failure and Thrombosis

HPLC-UV

PLANTS

Bromopyrrole Alkaloids of the Sponge *Agelas oroides* Collected Near the Israeli Mediterranean Coastline

C18

SPONGE

Calosides A-F, Cardenolides from *Calotropis gigantea* and Their Cytotoxic Activity

TLC/silica-gel

PLANT

Nostotrebin 6 Related Cyclopentenediones and  $\delta$ -Lactones with Broad Activity Spectrum Isolated from the Cultivation Medium of the Cyanobacterium Nostoc sp. CBT1153

HPLC-UV-MS  
BACTERIA

Immunosuppressive Nor-isopimarane Diterpenes from Cultures of the Fungicolous Fungus Xylaria longipes HFG1018

TLC/silica gel  
FUNGUS

Orthoscuticellines A–E,  $\beta$ -Carboline Alkaloids from the Bryozoan Orthoscuticella ventricosa Collected in Australia

HPLC-UV  
BRYOZOAN

Isocadiolides A–H: Polybrominated Aromatics from a Synoicum sp. Ascidian

HPLC-UV-MS  
BRYOZOAN

Rabenchromenone and Rabenzophenone, Phytotoxic Tetrasubstituted Chromenone and Hexasubstituted Benzophenone Constituents Produced by the Oak-Dieback-Associated Fungus Fimetariella rabenhorstii

TLC/silica gel  
FUNGUS

Phytotoxic Metabolites from Three Neofusicoccum Species Causal Agents of Botryosphaeria Dieback in Australia, Luteopyroxin, Neoanthraquinone, and Luteoxepinone, a Disubstituted Furo- $\alpha$ -pyrone, a Hexasubstituted Anthraquinone, and a Trisubstituted Oxepi-2-one from Neofusicoccum luteum

TLC/silica gel  
FUNGUS

Sigillins from Springtails Are Potent Natural Insecticides

GC-MS  
BUG

Discovery and Characterization of a PKS–NRPS Hybrid in Aspergillus terreus by Genome Mining

HPLC-UV  
FUNGUS

Yanhusanines A–F, Isoquinoline-Derived Alkaloid Enantiomers from Corydalis yanhusuo and Their Biological Activity

TLC/silica gel  
PLANT

Chrysosporazines F–M: P-Glycoprotein Inhibitory Phenylpropanoid Piperazines from an Australian Marine Fish Derived Fungus, Chrysosporium sp. CMB-F294

HPLC-UV  
FUNGUS

Polyesterified Sesquiterpenoids from the Seeds of *Celastrus paniculatus* as Lifespan-Extending Agents for the Nematode *Caenorhabditis elegans*

HPLC-UV

PLANT

Bishomoscalarane Sesterterpenoids from the Sponge *Dysidea granulosa* Collected in the South China Sea

TLC/silica gel

SPONGE

Amphiepicoccins A–J: Epipolythiodioxopiperazines from the Fish-Gill-Derived Fungus *Epicoccum nigrum*

HDN17-88

HPLC-UV

FUNGUS

Quintaquinone, a Merosesquiterpene from the Yellow Sponge *Verongula cf. rigida* Esper

TLC/silica gel

SPONGE

Identification of Holrhizins E–Q Reveals the Diversity of Nonribosomal Lipopeptides in *Paraburkholderia rhizoxinica*

HPLC-UV-MS

BACTERIA

A Fluorescent Compound from the Exuviae of the Scorpion, *Liocheles australasiae*

FLUORESCENCE

SCORPION

Kinase-Inhibitory Nucleoside Derivatives from the Pacific Bryozoan *Nelliella nelliiformis*

NMR

BRYOZOAN

**JNP 2020, ISSUE 3**

Anibamine and Its Analogues: Potent Antiplasmodial Agents from *Aniba citrifolia*

HPLC-UV

PLANT

Meliponamycins: Antimicrobials from Stingless Bee-Associated *Streptomyces* sp.

HPLC-UV

BACTERIA

Pagoamide A, a Cyclic Depsipeptide Isolated from a Cultured Marine Chlorophyte, *Derbesia* sp., Using MS/MS-Based Molecular Networking

HPLC-UV-MS

BACTERIA

Antioxidant Activity of Compounds Isolated from *Elaeagnus umbellata* Promotes Human Gingival Fibroblast Well-Being

HPLC-UV

PLANT

Advanced Glycation End Product Inhibition by Alkaloids from *Ocotea paranapiacabensis* for the Prevention of Skin Aging

TLC/silica-gel

PLANT

Antimycobacterial Rufomycin Analogues from *Streptomyces atratus* Strain MJM3502

UNCLEAR

BACTERIA

Arenicolins: C-Glycosylated Depsides from *Penicillium Arenicola*

HPLC-UV-MS

FUNGUS

$\alpha$ -Glucosidase and Protein Tyrosine Phosphatase 1B Inhibitors from *Malbranchea circinata*

TLC/silica-gel

PLANT

Megastigmane Derivatives from the Cladodes of *Opuntia humifusa* and Their Nitric Oxide Inhibitory Activities in Macrophages

HPLC-UV-MS

PLANT

Cryptic Species Account for the Seemingly Idiosyncratic Secondary Metabolism of *Sarcophyton glaucum* Specimens Collected in Palau

GC-FID

CORAL

Tridiscorhabdin and Didiscorhabdin, the First Discorhabdin Oligomers Linked with a Direct C–N Bridge from the Sponge *Latrunculia biformis* Collected from the Deep Sea in Antarctica

HPLC-UV-MS

SPONGE

Dynamic NMR and Computational Studies Inform the Conformational Description of Dendrillane Terpenes from the Nudibranch *Goniobranchus coi*

NMR

NUDIBRANCH

Antifungal Sesquiterpenoids, Rhodocoranes, from Submerged Cultures of the Wrinkled Peach Mushroom, *Rhodotus palmatus*

HPLC-UV

MUSHROOM

NF- $\kappa$ B Inhibitory and Antibacterial Helvolic and Fumagillin Derivatives from *Aspergillus terreus*

HPLC-UV

FUNGUS

Distribution of Bibenzyls, Prenyl Bibenzyls, Bis-bibenzyls, and Terpenoids in the Liverwort Genus *Radula*

TLC/NMR

PLANT



28 TOTAL PUBLICATIONS WHEN ONLY CHEMICAL ANALYSES OF MICOBES ARE INCLUDED (18 HPLC-UV)

64%

JNP 2020, ISSUE 1

Prenylated p-Terphenyls from a Mangrove Endophytic Fungus, *Aspergillus candidus* LDJ-5

HPLC-UV

FUNGUS

Water-Soluble Glutamic Acid Derivatives Produced in Culture by *Penicillium solitum* IS1-A from King George Island, Maritime Antarctica

HPLC-UV-MS

FUNGUS

l-Phenylalanine Alters the Privileged Secondary Metabolite Production in the Marine-Derived Fungus *Trichoderma erinaceum* F1-1

HPLC-UV

FUNGUS

Structurally Diverse Meroterpenoids from a Marine-Derived *Aspergillus* sp. Fungus

TLC/silica gel

FUNGUS

Benwamycins A–G, Trialkyl-Substituted Benzene Derivatives from a Soil-Derived *Streptomyces*

HPLC-UV

BACTERIA

Reisolation and Configurational Reinvestigation of Cottoquinazolines E–G from an Arthropod-Derived Strain of the Fungus *Neosartorya fischeri*

TLC/silica gel

FUNGUS

Unraveling Structures Containing Highly Conjugated Pyrrolo[4,3,2-de]quinoline Cores That Are Deficient in Diagnostic Proton NMR Signals

NMR

FUNGUS

**JNP 2020, ISSUE 2**

Isolation, Identification, and Decomposition of Antibacterial Dialkylresorcinols from a Chinese *Pseudomonas aurantiaca* Strain

HPLC-UV

BACTERIA

The Isolation of Pyrroloformamide Congeners and Characterization of Their Biosynthetic Gene Cluster UNCLEAR (“During activity-based metabolite profiling of actinomycete strains...”)

BACTERIA

Oxygenated Cyclohexene Derivatives and Other Constituents from the Roots of *Monanthotaxis trichocarpa*

TLC/silica gel

FUNGUS

19-nor-, 20-nor-, and tetranor-Halimane-Type Furanoditerpenoids from *Croton crassifolius*

TLC/silica gel

FUNGUS

Absolute Configuration and Antibiotic Activity of Piceamycin

HPLC-UV

BACTERIA

Siderophores from the Entomopathogenic Fungus *Beauveria bassiana*

HPLC-UV-MS

BACTERIA

Antifungal Norditerpene Odiolactones from the Fungus *Oidiodendron truncatum*, a Potential Biocontrol Agent for White-Nose Syndrome in Bats

HPLC-UV

FUNGUS

Absolute Configuration and Corrected NMR Assignment of 17-Hydroxycyclooctatin, a Fused 5–8–5 Tricyclic Diterpene

HPLC-UV

BACTERIA

Nostotrebin 6 Related Cyclopentenediones and  $\delta$ -Lactones with Broad Activity Spectrum Isolated from the Cultivation Medium of the Cyanobacterium *Nostoc* sp. CBT1153

HPLC-UV-MS

BACTERIA

Immunosuppressive Nor-isopimarane Diterpenes from Cultures of the Fungicolous Fungus *Xylaria longipes* HFG1018

TLC/silica gel

FUNGUS

Rabenchromenone and Rabenzophenone, Phytotoxic Tetrasubstituted Chromenone and Hexasubstituted Benzophenone Constituents Produced by the Oak-Decline-Associated Fungus *Fimetariella rabenhorstii*  
TLC/silica gel  
FUNGUS

Phytotoxic Metabolites from Three *Neofusicoccum* Species Causal Agents of Botryosphaeria Dieback in Australia, Luteopyroxin, Neoanthraquinone, and Luteoxepinone, a Disubstituted Furo- $\alpha$ -pyrone, a Hexasubstituted Anthraquinone, and a Trisubstituted Oxepi-2-one from *Neofusicoccum luteum*  
TLC/silica gel  
FUNGUS

Discovery and Characterization of a PKS–NRPS Hybrid in *Aspergillus terreus* by Genome Mining  
HPLC-UV  
FUNGUS

Chrysosporazines F–M: P-Glycoprotein Inhibitory Phenylpropanoid Piperazines from an Australian Marine Fish Derived Fungus, *Chrysosporium* sp. CMB-F294  
HPLC-UV  
FUNGUS

Amphiepicoccins A–J: Epipolythiodioxopiperazines from the Fish-Gill-Derived Fungus *Epicoccum nigrum*  
HDN17-88  
HPLC-UV  
FUNGUS

Identification of Holrhizins E–Q Reveals the Diversity of Nonribosomal Lipopeptides in *Paraburkholderia rhizoxinica*  
HPLC-UV-MS  
BACTERIA

**JNP 2020, ISSUE 3**

Meliponamycins: Antimicrobials from Stingless Bee-Associated *Streptomyces* sp.

HPLC-UV

BACTERIA

Pagoamide A, a Cyclic Depsipeptide Isolated from a Cultured Marine Chlorophyte, *Derbesia* sp., Using MS/MS-Based Molecular Networking

HPLC-UV-MS

BACTERIA

Antimycobacterial Rufomycin Analogues from *Streptomyces atratus* Strain MJM3502

UNCLEAR

BACTERIA

Arenicolins: C-Glycosylated Depsides from *Penicillium Arenicola*

HPLC-UV-MS

FUNGUS

NF- $\kappa$ B Inhibitory and Antibacterial Helvolic and Fumagillin Derivatives from *Aspergillus terreus*

HPLC-UV

FUNGUS
